# Supplementary material
Source: publisher site journal article supplement (https://www.dovepress.com/get_supplementary_file.php?f=452014.docx)
Supplement: Supplementary file 1 [file get_supplementary_file.php]

Supplementary table 1 Analysis of difference of ureaplasma urealyticum detection rate in different age groups

| χ2/*P* | 1-7day | 8-14day | 15-21day | 22-28day |
| --- | --- | --- | --- | --- |
| 1-7day | - | 2.456/0.117 | 1.377/0.241 | 2.903/0.088 |
| 8-14day | - | - | 0.077/0.782 | 0.110/0.741 |
| 15-21day | - | - | - | 0.333/0.564 |
| 22-28day | - | - | - | - |

Supplementary table 2 Analysis of difference of ureaplasma urealyticum detection rate in different seasons

| χ2/*P* | spring | summer | autumn | winter |
| --- | --- | --- | --- | --- |
| spring | - | 0.680/0.409 | 0.000/0.989 | 5.424/0.020 |
| summer | - | - | 0.741/0.389 | 2.463/0.117 |
| autumn | - | - | - | 5.742/0.017 |
| winter | - | - | - | - |
